# Supplementary material for: ChIP-GSM: Inferring active transcription factor modules to predict functional regulatory elements
Source: PLoS Comput Biol. 2021 Jul 22;17(7):e1009203. doi: 10.1371/journal.pcbi.1009203 (PMC8330942; doi:10.1371/journal.pcbi.1009203)
Supplement: S7 Table — (XLSX) [file pcbi.1009203.s020.xlsx]

## Sheet: Table S7
S7 Table. Differentially expressed genes regulated by each group of modules in K562 cells.
GATA1, GATA2, TAL1, TEAD4	FOSL1, NFYA, NFYB	FOSL1, JUND	FOS, JUND	CEBPB, JUND	EGR1, ZBTB7A	EGR1, PHF8, ZBTB7A	CHD1, RBBP5	BCLAF1, PML	BACH1, MAFF, MAFK
AKR1C1	ACLY	AAK1	AHNAK	AAK1	AHNAK	ABCA2	ALDH1A2	ANXA1	ABCB6
AQP8	ADAM9	ADM	ANKRD53	ADAM17	ANKRD11	ACBD3	ARID1A	CD69	ALDH5A1
ARID1A	APOC1	AQP3	APOC1	ANXA1	AXL	ACVR1B	BAZ2A	CYP3A5	ASF1A
ASF1A	APOE	AXL	ARFGAP1	ATF5	BAZ2A	ADAMTS3	BCL2L1	DDAH2	BAX
ATP2C1	ARNTL	C1orf116	ARID3B	B4GALT1	BBC3	AHNAK	BCLAF1	DNAJB4	BMX
ATP6V0A2	ATXN2L	CACNA1I	ASPH	BCL6	CCND1	ALDH5A1	BMPR2	EGR1	CREBZF
AVPR2	BCKDHB	CAPN2	ATF3	BTG3	CDKN1C	ARHGDIA	BRWD1	G6PC3	CTSD
BLVRB	BRWD1	CASP2	BBC3	C5AR1	CHD4	ARID3B	C22orf29	HIST1H2AC	CUL4A
C1orf116	BTN2A2	CAV3	C6orf106	C6orf106	CLCF1	ARNT	CASP2	HSP90B1	FAH
CA1	C2orf42	CHMP1B	CASS4	CCPG1	CLDN15	ATF1	CDC42	HSPA5	FBXW4P1
CD59	CAPN10	CLCF1	CD84	CEBPB	CLIP2	ATP2B4	CLIC4	JUN	FECH
CDC42EP1	CCNG2	CLIP2	CHMP1B	CTH	COL6A2	ATXN2L	COL18A1	LDLR	FTH1
COL18A1	CDC42	CLU	CLIP2	DDAH2	CST6	B4GALT1	CRKL	MCL1	GAB2
COL1A1	CNTD2	COL16A1	CNN1	FTH1	CTSB	BICD1	DNAJB1	MID1IP1	GCLC
CPNE3	CYLD	CRYZ	COL6A1	GTPBP2	CTSH	BRWD1	DNAJB9	PIK3CG	GPLD1
CPOX	DHCR24	CTTN	COL7A1	HSPA5	DTNB	C11orf68	DYRK1A	POLDIP3	HIST1H2AC
CRYZ	DNAJC3	DDAH2	CPOX	HSPB7	FKBP5	CAMSAP1	FAM115A	RRM2	HMGA1
CTSB	DSE	DUSP5	CRHBP	IDH1	FLNC	CASP2	FTH1	SLC2A3	HMOX1
CYP26A1	ELOVL6	DYNC1H1	CST6	IFI16	GJC2	CBL	FUBP1	STAT5B	HSPA1L
CYP3A43	EXOSC2	ETV5	DUSP1	IL1A	GPC1	CC2D1A	G3BP2	TXNIP	HTATIP2
DGCR8	FDXR	FAM131A	EIF5	IL1R1	GRINA	CDC42EP1	GLUL	VAMP2	IDUA
DNAJB2	FXR2	FLNC	EXOC7	INHBE	GYG2	CDKN1C	H2AFX	WASL	IFRD1
E2F1	GART	FNDC4	FAH	IRF2BP1	HBEGF	CEBPB	HES1		IL1R1
EMILIN2	GFPT1	FXYD2	FHOD1	ITGB1	HCN2	CFLAR	HS3ST3A1		KCNAB2
EMX2	GM2A	GJC2	FKBP5	KIF21B	HES1	CHD4	IER3		KLF1
EPB41	GMFG	GSR	FLNC	LARS2	HMGA1	CLCF1	IKZF1		MAFG
EZH1	H2AFX	INTS7	FOSL1	LRRC23	IL2RG	COL11A2	ITGB1		NEBL
FECH	HDAC6	KEL	GDF15	MASP1	INHBE	CPEB1	MCL1		NQO1
FOXO3	HLA-C	KPNA6	GRAP2	MED15	IRF2BP1	CTNNB1	MED15		PSAP
FTH1	HMGCR	LCP2	HCFC1R1	MINPP1	ISOC2	CTSB	MTA2		PSME4
GAD2	HSP90B1	MARS	HMGA1	MLLT11	JUP	CXCL3	P4HA1		RPS6KC1
GJC2	IER5	MATN1	HNRNPM	MMP19	LBH	DDIT3	PAX6		SERTAD2
GTPBP2	IFI6	MBNL1	HSPB7	MTHFR	LEF1	DNAJB1	PHTF1		SH3BP5
GYPE	IFT122	NEK9	IFI6	NCKAP1	MARCKSL1	DYRK1A	PITX1		SLC6A6
H2AFX	INSIG1	PEX6	INSIG1	NDUFA5	MARK4	DYRK2	PTBP1		SPTA1
HDAC6	ISOC2	PLAT	KLF6	NFIL3	MATN1	EEA1	RPS6		STYK1
HDHD3	JUN	PLEKHF1	LDLR	PECAM1	MCAM	EGR1	RXRA		TFE3
HEPH	KDELC1	PTHLH	LZTR1	PLD1	MEPCE	EPS15L1	SAFB2		UBE2O
HNMT	KLF1	PTPRB	MAFG	RBCK1	MICAL1	FAM115A	SCD		ULK1
IL1R1	KLF6	PVT1	MAFK	RHBDF1	MVP	FAM131A	SMC4		ZC3HAV1
ISOC2	KPNB1	RAI1	MAP7D1	RTN4	NAB2	FAM69A	SOCS2		ZNF3
KEL	LAPTM5	RTN4	MAPK13	RUFY3	NCR3	FBXL8	SOD2
KIF3B	LDLR	SH3BP5	MBOAT7	SAT1	NES	FGFR3	SQLE
KLF1	LIN37	SIN3B	MFN2	SH3BGR	NFATC4	FGFR4	TBX1
LEPR	LPAR2	TLR6	NAB2	SSH3	NOL12	FHOD1	TESC
LIG3	MAP1A	TMEM180	NEBL	ST7L	NTRK1	FNDC4	TMC6
LXN	MID1IP1	TXNRD1	NR2F6	STAR	P2RX5	FOXO3	TNFRSF10B
MAPK13	MOG	UPP1	PCF11	STAT5B	PCGF1	GDF15	TRA2A
NDEL1	MPHOSPH9	VWA5A	PCM1	TBL1X	PDGFA	GMIP	TRIP6
NENF	MR1	ZBTB43	PHF1	TES	PIM1	GPATCH8	TSPAN32
NPL	MTA2		PITX1	TMEM180	PLCD1	GPR107	WASL
PCYT1A	MYBPC2		PLK3	TNFRSF10B	PLEKHF1	GRB10	WNK1
PDK1	NFIL3		PTHLH	TNKS	PPP1R15A	GRINA	YES1
PLAT	NFYA		PTOV1	TPMT	PRKCD	GSN	ZC3HAV1
PPOX	NKTR		PTRF	ZNF217	PTPN7	GTF2I
PPP1R15A	NR4A1		RANBP6	ZNF518A	PTRF	GTPBP2
PRKAB1	NSDHL		RHBDF1		RASGRP2	HCFC1
PURG	PAX6		SCG3		RFX2	HDAC6
PVT1	PEX6		SH2B3		SBF1	HGSNAT
RAC2	PHF1		SLC25A23		SCN3B	HIP1
RELN	PKLR		SLC39A7		SERPINE1	HMGA1
RPP25	PPP1R3D		SLC9A1		SERTAD2	HSPB11
SIDT2	PRR11		SLMO1		SH2B3	IDUA
SLC6A9	PTBP1		SNX29		SH3BP2	IER3
TES	PTRF		SS18		SLC10A3	INSIG1
TF	RABGAP1		STX3		SLC16A3	INTS1
TSPAN32	RALGPS1		TBC1D15		SMAD3	IRF2BP1
UBE2H	RERE		TCIRG1		SYN3	ISOC2
UROD	RHOQ		TGIF1		TAPBP	JUN
ZMYND8	SAT1		TMC6		TBCD	LBH
ZNF202	SCD		UBE2L3		TBL1X	LEPR
ZNF669	SH3BGR		ZC3H12A		TBXA2R	LIG3
ZNF79	SLC25A28		ZFP36		TCF7	LSS
	SLC39A2		ZGPAT		THAP3	LY6E
	SLC39A7		ZNF440		TMC6	MAFF
	SLC46A3		ZNF512B		TRPM4	MAPK8
	SPHK2				TSPAN9	MBOAT7
	TAPBP				TSPYL2	ME1
	TES				ULK1	MEPCE
	TFAP4				VASP	MIA3
	TM7SF2				WBP2	MICAL1
	TNFSF9				YWHAZ	MICALL1
	TPP2				ZBTB7B	MIER2
	TSPYL2				ZFP36	MINK1
	TXNIP				ZNF512B	MYO9B
	UCP2					NDUFA8
	VAMP2					NFYA
	WBP2					NKTR
	WDR37					NPC1
	WDR59					NR2F6
	XAB2					PACRG
	YIPF4					PCGF2
	YPEL5					PDE3B
	ZMYND8					PHF1
	ZNF280A					PIM1
						PITX1
						PLCD1
						PLD3
						PLEKHF1
						PNPLA2
						POFUT2
						PPIL2
						PTOV1
						RCAN3
						RNF103
						RNF24
						RTN2
						RUFY3
						RUSC2
						RXRA
						SBNO2
						SERPINB1
						SERPINB9
						SERTAD2
						SH2B3
						SIN3B
						SKIL
						SLC25A23
						SLC39A7
						SMAD3
						SMURF1
						SOCS2
						SPRED2
						SQLE
						SQSTM1
						ST6GAL1
						SYNCRIP
						TBX1
						TCF25
						THRAP3
						TMEM123
						TMEM63A
						TRIP6
						TSC22D1
						TSKU
						VAMP2
						VASP
						WHSC1L1
						YES1
						ZC3H12A
						ZNF335
						ZNF512B
						ZNF557
						ZNF580
